# Supplementary material
Source: publisher site journal article supplement (https://www.dovepress.com/article/255483)
Supplement: Supplementary file 1 [file get_supplementary_file.php]

Supplementary Table: All Participants' Responses \*

| Section 2: Knowledge                          |                                                                                                                                   |                          |                                |                             |         |
|-----------------------------------------------|-----------------------------------------------------------------------------------------------------------------------------------|--------------------------|--------------------------------|-----------------------------|---------|
| 2.1. Knowledge of the Transgender Identity    |                                                                                                                                   |                          |                                |                             |         |
| #                                             | Statement                                                                                                                         | Overall (N=249)<br>n (%) | Pre-Clinical (N =113)<br>n (%) | Clinical (N = 136)<br>n (%) | p-value |
| 1                                             | Gender identity is always the same as sex assigned at birth.<br>Strongly Disagree/Disagree<br>Strongly Agree/Agree                | 146 (58.6)<br>67 (26.9)  | 62 (54.9)<br>38 (33.6)         | 84 (61.8)<br>29 (21.3)      | 0.073   |
| 2                                             | Gender identity is synonymous with sexual orientation.<br>Strongly Disagree/Disagree<br>Strongly Agree/Agree                      | 139 (55.8)<br>55 (22.1)  | 56 (49.6)<br>33 (29.2)         | 83 (61.0)<br>22 (16.2)      | 0.044   |
| 3                                             | The transgender identity is an inherited condition.<br>Strongly Disagree/Disagree<br>Strongly Agree/Agree                         | 111 (44.6)<br>71 (28.5)  | 53 (46.9)<br>36 (31.9)         | 58 (42.6)<br>35 (25.7)      | 0.171   |
| 4                                             | The transgender identity is a contagious condition.<br>Strongly Disagree/Disagree<br>Strongly Agree/Agree                         | 224 (90.0)<br>10 (4.0)   | 102 (90.3)<br>4 (3.5)          | 122 (89.7)<br>6 (4.4)       | 0.938   |
| 5                                             | The transgender identity is a modern concept due to the influence of media.<br>Strongly Disagree/Disagree<br>Strongly Agree/Agree | 175 (70.3)<br>23 (9.2)   | 80 (70.8)<br>14 (12.4)         | 95 (69.9)<br>9 (6.6)        | 0.166   |
| 6                                             | The transgender identity is always a choice.<br>Strongly Disagree/Disagree<br>Strongly Agree/Agree                                | 123 (49.4)<br>63 (25.3)  | 61 (54.0)<br>28 (24.8)         | 62 (45.6)<br>35 (25.7)      | 0.324   |
| 7                                             | The transgender identity is a disease.<br>Strongly Disagree/Disagree<br>Strongly Agree/Agree                                      | 206 (82.7)<br>17 (6.8)   | 98 (86.7)<br>6 (5.3)           | 108 (79.4)<br>11 (8.1)      | 0.315   |
| 8                                             | The transgender identity is a mental illness.<br>Strongly Disagree/Disagree<br>Strongly Agree/Agree                               | 200 (80.3)<br>15 (6.0)   | 95 (84.1)<br>5 (4.4)           | 105 (77.2)<br>10 (7.4)      | 0.379   |
| 9                                             | The term "transgender" is synonymous with "intersex".<br>Strongly Disagree/Disagree<br>Strongly Agree/Agree                       | 116 (46.6)<br>15 (6.0)   | 52 (46.0)<br>7 (6.2)           | 64 (47.1)<br>8 (5.9)        | 0.984   |
| 10                                            | The term "transgender" is synonymous with "transvestite".<br>Strongly Disagree/Disagree<br>Strongly Agree/Agree                   | 95 (38.2)<br>17 (6.8)    | 28 (24.8)<br>11 (9.7)          | 67 (49.3)<br>6 (4.4)        | < 0.001 |
| 2.2. Knowledge of Differences in Health Needs |                                                                                                                                   |                          |                                |                             |         |
| 1                                             | Individuals who identify as transgender always have physical deformities.<br>Strongly Disagree/Disagree<br>Strongly Agree/Agree   | 157 (63.1)<br>36 (14.5)  | 69 (61.1)<br>19 (16.8)         | 88 (64.7)<br>17 (12.5)      | 0.626   |
| 2                                             | Patients who identify as transgender may have unique health risks and needs.                                                      |                          |                                |                             |         |

|                                      |                                                                                                                                                                                      |                         |                        |                        |       |
|--------------------------------------|--------------------------------------------------------------------------------------------------------------------------------------------------------------------------------------|-------------------------|------------------------|------------------------|-------|
|                                      | Strongly Disagree/Disagree<br>Strongly Agree/Agree                                                                                                                                   | 51 (20.5)<br>132 (53.0) | 27 (23.9)<br>52 (46.0) | 24 (17.6)<br>80 (58.8) | 0.130 |
| 3                                    | Individuals who identify as transgender are naturally sterile and cannot reproduce.<br>Strongly Disagree/Disagree<br>Strongly Agree/Agree                                            | 73 (29.3)<br>76 (30.5)  | 29 (25.7)<br>43 (38.1) | 44 (32.4)<br>33 (24.3) | 0.062 |
| 4                                    | Individuals who identify as transgender have a higher incidence of substance abuse than the general population.<br>Strongly Disagree/Disagree<br>Strongly Agree/Agree                | 48 (19.3)<br>77 (30.9)  | 21 (18.6)<br>32 (28.3) | 27 (19.9)<br>45 (33.1) | 0.620 |
| 5                                    | Individuals who identify as transgender have a higher incidence of sexually transmitted illnesses than the general population.<br>Strongly Disagree/Disagree<br>Strongly Agree/Agree | 39 (15.7)<br>95 (38.2)  | 24 (21.2)<br>31 (27.4) | 15 (11.0)<br>64 (47.1) | 0.003 |
| 6                                    | Individuals who identify as transgender are more likely to develop mental illnesses than the general population.<br>Strongly Disagree/Disagree<br>Strongly Agree/Agree               | 36 (14.5)<br>129 (51.8) | 19 (16.8)<br>54 (47.8) | 17 (12.5)<br>75 (55.1) | 0.447 |
| 7                                    | Individuals who identify as transgender have higher suicide rates than the general population.<br>Strongly Disagree/Disagree<br>Strongly Agree/Agree                                 | 17 (6.8)<br>126 (50.6)  | 13 (11.5)<br>48 (42.5) | 4 (2.9)<br>78 (57.4)   | 0.007 |
| 8                                    | Individuals who identify as transgender who receive hormonal therapy are more susceptible to certain conditions as a result<br>Strongly Disagree/Disagree<br>Strongly Agree/Agree    | 21 (8.4)<br>82 (32.9)   | 11 (9.7)<br>25 (22.1)  | 10 (7.4)<br>57 (41.9)  | 0.004 |
| 9                                    | There are sufficient physician treatment guidelines for patients who identify as transgender<br>Strongly Disagree/Disagree<br>Strongly Agree/Agree                                   | 129 (51.8)<br>27 (10.8) | 54 (47.8)<br>12 (10.6) | 75 (55.1)<br>15 (11.0) | 0.438 |
| 10                                   | There has been sufficient medical research conducted on the health of individuals who identify as transgender .<br>Strongly Disagree/Disagree<br>Strongly Agree/Agree                | 145 (58.2)<br>19 (7.6)  | 60 (53.1)<br>12 (10.6) | 85 (62.5)<br>7 (5.1)   | 0.162 |
| Section 3: Perceptions and Attitudes |                                                                                                                                                                                      |                         |                        |                        |       |
| 3.1. Societal Perceptions            |                                                                                                                                                                                      |                         |                        |                        |       |
| 1                                    | Individuals who identify as transgender are well-integrated into society.<br>Strongly Disagree/Disagree<br>Strongly Agree/Agree                                                      | 229 (92.0)<br>5 (2.0)   | 104 (92.0)<br>3 (2.7)  | 125 (91.9)<br>2 (1.5)  | 0.738 |
| 2                                    | Individuals who identify as transgender currently have equal access to education.<br>Strongly Disagree/Disagree<br>Strongly Agree/Agree                                              | 224 (90.0)<br>8 (3.2)   | 104 (92.0)<br>4 (3.5)  | 120 (88.2)<br>4 (2.9)  | 0.383 |

|                                |                                                                                                                                                                         |                                                |                                            |                                               |       |
|--------------------------------|-------------------------------------------------------------------------------------------------------------------------------------------------------------------------|------------------------------------------------|--------------------------------------------|-----------------------------------------------|-------|
| 3                              | Individuals who identify as transgender currently have equal access to employment.<br>Strongly Disagree/Disagree<br>Strongly Agree/Agree                                | 227 (91.2)<br>6 (2.4)                          | 104 (92.0)<br>5 (4.4)                      | 123 (90.4)<br>1 (0.7)                         | 0.038 |
| 4                              | Individuals who identify as transgender currently have equal access to housing.<br>Strongly Disagree/Disagree<br>Strongly Agree/Agree                                   | 206 (82.7)<br>16 (6.4)                         | 94 (83.2)<br>7 (6.2)                       | 112 (82.4)<br>9 (6.6)                         | 0.984 |
| 5                              | Individuals who identify as transgender currently have equal access to healthcare.<br>Strongly Disagree/Disagree<br>Strongly Agree/Agree                                | 195 (78.3)<br>26 (10.4)                        | 92 (81.4)<br>11 (9.7)                      | 103 (75.7)<br>15 (11.0)                       | 0.494 |
| 6                              | Individuals who identify as transgender currently have equal access to legal justice.<br>Strongly Disagree/Disagree<br>Strongly Agree/Agree                             | 204 (81.9)<br>16 (6.4)                         | 95 (84.1)<br>7 (6.2)                       | 109 (80.1)<br>9 (6.6)                         | 0.676 |
| 7                              | Individuals who identify as transgender are victims of societal harassment.<br>Strongly Disagree/Disagree<br>Strongly Agree/Agree                                       | 18 (7.2)<br>209 (83.9)                         | 7 (6.2)<br>95 (84.1)                       | 11 (8.1)<br>114 (83.8)                        | 0.780 |
| 8                              | Society is accepting of individuals who identify as transgender<br>Strongly Disagree/Disagree<br>Strongly Agree/Agree                                                   | 228 (91.6)<br>8 (3.2)                          | 104 (92.0)<br>4 (3.5)                      | 124 (91.2)<br>4 (2.9)                         | 0.850 |
| 9                              | Individuals who identify as transgender frequently experience rejection by their own families.<br>Strongly Disagree/Disagree<br>Strongly Agree/Agree                    | 26 (10.4)<br>204 (81.9)                        | 9 (8.0)<br>94 (83.2)                       | 17 (12.5)<br>110 (80.9)                       | 0.436 |
| 10                             | Society feels that individuals who identify as transgender spread immorality and promiscuity.<br>Strongly Disagree/Disagree<br>Strongly Agree/Agree                     | 23 (9.2)<br>167 (67.1)                         | 9 (8.0)<br>77 (68.1)                       | 14 (10.3)<br>90 (66.2)                        | 0.818 |
| 11                             | Society feels that individuals who identify as transgender should remain confined to their designated localities.<br>Strongly Disagree/Disagree<br>Strongly Agree/Agree | 31 (12.4)<br>173 (69.5)                        | 14 (12.4)<br>82 (72.6)                     | 17 (12.5)<br>91 (66.9)                        | 0.513 |
| <b>3.2. Personal Attitudes</b> |                                                                                                                                                                         |                                                |                                            |                                               |       |
| 1                              | I am comfortable around individuals who identify as transgender.<br>Strongly Disagree<br>Disagree<br>Agree<br>Strongly Agree                                            | 4 (1.6)<br>20 (8.0)<br>110 (44.2)<br>53 (21.3) | 0 (0)<br>7 (6.2)<br>45 (39.8)<br>32 (28.3) | 4 (2.9)<br>13 (9.6)<br>65 (47.8)<br>21 (15.4) | 0.022 |
| 2                              | I would feel comfortable working closely with an individual who identifies as transgender in my workplace .<br>Strongly Disagree                                        | 3 (1.2)                                        | 0 (0)                                      | 3 (2.2)                                       | 0.460 |

|   |                                                                                                                                                                                                |                                                |                                                |                                               |       |
|---|------------------------------------------------------------------------------------------------------------------------------------------------------------------------------------------------|------------------------------------------------|------------------------------------------------|-----------------------------------------------|-------|
|   | Disagree<br>Agree<br>Strongly Agree                                                                                                                                                            | 13 (5.2)<br>115 (46.2)<br>66 (26.5)            | 5 (4.4)<br>50 (44.2)<br>32 (28.3)              | 8 (5.9)<br>65 (47.8)<br>34 (25.0)             |       |
| 3 | I believe I could be friends with an individual who identifies as transgender.<br><br>Strongly Disagree<br>Disagree<br>Agree<br>Strongly Agree                                                 | 2 (0.8)<br>10 (4.0)<br>117 (47.0)<br>72 (28.9) | 0 (0)<br>8 (7.1)<br>50 (44.2)<br>32 (28.3)     | 2 (1.5)<br>2 (1.5)<br>67 (49.3)<br>40 (29.4)  | 0.137 |
| 4 | As a doctor, I would be comfortable treating an individual who identifies as transgender.<br><br>Strongly Disagree<br>Disagree<br>Agree<br>Strongly Agree                                      | 1 (0.4)<br>6 (2.4)<br>100 (40.2)<br>118 (47.4) | 0 (0)<br>4 (3.5)<br>48 (42.5)<br>52 (46.0)     | 1 (0.7)<br>2 (1.5)<br>52 (38.2)<br>66 (48.5)  | 0.577 |
| 5 | I would feel comfortable having an individual who identifies as transgender working in my home .<br><br>Strongly Disagree<br>Disagree<br>Agree<br>Strongly Agree                               | 3 (1.2)<br>17 (6.8)<br>103 (41.4)<br>71 (28.5) | 0 (0)<br>10 (8.8)<br>46 (40.7)<br>32 (28.3)    | 3 (2.2)<br>7 (5.1)<br>40 (40.7)<br>32 (28.3)  | 0.440 |
| 6 | I would feel comfortable being served by an individual who identifies as transgender at a store or restaurant .<br><br>Strongly Disagree<br>Disagree<br>Agree<br>Strongly Agree                | 2 (0.8)<br>5 (2.0)<br>131 (52.6)<br>98 (39.4)  | 0 (0)<br>2 (1.8)<br>63 (55.8)<br>43 (38.1)     | 2 (1.5)<br>3 (2.2)<br>68 (50.0)<br>55 (40.4)  | 0.654 |
| 7 | I would feel comfortable sharing a living space with an individual who identifies as transgender.<br><br>Strongly Disagree<br>Disagree<br>Agree<br>Strongly Agree                              | 4 (1.6)<br>33 (13.3)<br>80 (32.1)<br>53 (21.3) | 1 (0.9)<br>22 (19.5)<br>33 (29.2)<br>27 (23.9) | 3 (2.2)<br>11 (8.1)<br>47 (34.6)<br>26 (19.1) | 0.047 |
| 8 | I believe an individual who identifies as transgender should be treated with the same respect and dignity as any other person.<br><br>Strongly Disagree<br>Disagree<br>Agree<br>Strongly Agree | 3 (1.2)<br>2 (0.8)<br>68 (27.3)<br>169 (67.9)  | 1 (0.9)<br>0 (0)<br>33 (29.2)<br>77 (68.1)     | 2 (1.5)<br>2 (1.5)<br>35 (25.7)<br>92 (67.6)  | 0.573 |
| 9 | I would intervene to help if I saw an individual who identifies as transgender being teased or mistreated.<br><br>Strongly Disagree<br>Disagree<br>Agree                                       | 4 (1.6)<br>1 (0.4)<br>126 (50.6)               | 1 (0.9)<br>1 (0.9)<br>64 (56.6)                | 3 (2.2)<br>0 (0)<br>62 (45.6)                 | 0.262 |

|                                 |                                                                                                                  |            |           |           |       |
|---------------------------------|------------------------------------------------------------------------------------------------------------------|------------|-----------|-----------|-------|
|                                 | Strongly Agree                                                                                                   | 85 (34.1)  | 34 (30.1) | 51 (37.5) |       |
| 10                              | I would be upset if someone I'd known for a long time revealed that they used to identify as a different gender. |            |           |           | 0.291 |
|                                 | Strongly Disagree                                                                                                | 33 (13.3)  | 11 (9.7)  | 22 (16.2) |       |
|                                 | Disagree                                                                                                         | 71 (28.5)  | 28 (24.8) | 43 (31.6) |       |
|                                 | Agree                                                                                                            | 50 (20.1)  | 25 (22.1) | 25 (18.4) |       |
|                                 | Strongly Agree                                                                                                   | 20 (8.0)   | 11 (9.7)  | 9 (6.6)   |       |
| 11                              | I believe individuals who identify as transgender should have the opportunity to change their name.              |            |           |           | 0.675 |
|                                 | Strongly Disagree                                                                                                | 3 (1.2)    | 2 (1.8)   | 1 (0.7)   |       |
|                                 | Disagree                                                                                                         | 37 (14.9)  | 19 (16.8) | 18 (13.2) |       |
|                                 | Agree                                                                                                            | 116 (46.6) | 53 (46.9) | 63 (46.3) |       |
|                                 | Strongly Agree                                                                                                   | 93 (37.3)  | 39 (34.5) | 54 (39.7) |       |
| 12                              | Individuals who identify as transgender should be facilitated if they want to medically/surgically transition .  |            |           |           | 0.801 |
|                                 | Strongly Disagree                                                                                                | 5 (2.0)    | 3 (2.7)   | 2 (1.5)   |       |
|                                 | Disagree                                                                                                         | 5 (2.0)    | 3 (2.7)   | 2 (1.5)   |       |
|                                 | Agree                                                                                                            | 104 (41.8) | 44 (38.9) | 60 (44.1) |       |
|                                 | Strongly Agree                                                                                                   | 91 (36.5)  | 41 (36.3) | 50 (36.8) |       |
| 13                              | Individuals who identify as transgender should be allowed to raise children .                                    |            |           |           | 0.276 |
|                                 | Strongly Disagree                                                                                                | 5 (2.0)    | 2 (1.8)   | 3 (2.2)   |       |
|                                 | Disagree                                                                                                         | 6 (2.4)    | 3 (2.7)   | 3 (2.2)   |       |
|                                 | Agree                                                                                                            | 111 (44.6) | 45 (39.8) | 66 (48.5) |       |
|                                 | Strongly Agree                                                                                                   | 82 (32.9)  | 36 (31.9) | 46 (33.8) |       |
| 14                              | Individuals who identify as transgender should be forcefully sterilized.                                         |            |           |           | 0.054 |
|                                 | Strongly Disagree                                                                                                | 145 (58.2) | 60 (53.1) | 85 (62.5) |       |
|                                 | Disagree                                                                                                         | 67 (26.9)  | 33 (29.2) | 34 (25.0) |       |
|                                 | Agree                                                                                                            | 10 (4.0)   | 2 (1.8)   | 8 (5.9)   |       |
|                                 | Strongly Agree                                                                                                   | 4 (1.6)    | 3 (2.7)   | 1 (0.7)   |       |
| Section 4. Clinical Experiences |                                                                                                                  |            |           |           |       |
| 1                               | I feel individuals who identify as transgender are treated differently in a clinical setting.                    |            |           |           | 0.863 |
|                                 | Strongly Disagree/Disagree                                                                                       | 19 (7.6)   | 8 (7.1)   | 11 (8.1)  |       |
|                                 | Strongly Agree/Agree                                                                                             | 146 (58.6) | 65 (57.5) | 81 (59.6) |       |
| 2                               | I feel that it would be difficult to discuss sexual health with patients who identify as transgender .           |            |           |           | 0.146 |
|                                 | Strongly Disagree/Disagree                                                                                       | 98 (39.4)  | 52 (46.0) | 46 (33.8) |       |
|                                 | Strongly Agree/Agree                                                                                             | 74 (29.7)  | 30 (26.5) | 44 (32.4) |       |
| 3                               | I would feel unsure of how to address patients who identify as transgender.                                      |            |           |           | 0.046 |
|                                 | Strongly Disagree/Disagree                                                                                       | 71 (28.5)  | 41 (36.3) | 30 (22.1) |       |
|                                 | Strongly Agree/Agree                                                                                             | 124 (49.8) | 50 (44.2) | 75 (54.4) |       |

|                                                                          |                                                                                                                                                                                                                                                 |                                                 |                                              |                                              |       |
|--------------------------------------------------------------------------|-------------------------------------------------------------------------------------------------------------------------------------------------------------------------------------------------------------------------------------------------|-------------------------------------------------|----------------------------------------------|----------------------------------------------|-------|
| 4                                                                        | I would feel unsure of how to perform a clinical examination on a patient who identifies as transgender.<br>Strongly Disagree/Disagree<br>Strongly Agree/Agree                                                                                  | 86 (34.5)<br>95 (38.2)                          | 46 (40.7)<br>39 (34.5)                       | 40 (29.4)<br>56 (41.2)                       | 0.175 |
| 5                                                                        | I would feel unsure of the need for a chaperone while examining a patient who identifies as transgender.<br>Strongly Disagree/Disagree<br>Strongly Agree/Agree                                                                                  | 80 (32.1)<br>85 (34.1)                          | 41 (36.3)<br>33 (29.2)                       | 39 (28.7)<br>52 (38.2)                       | 0.269 |
| Section 6. Perceived Need for Trans-health within the Medical Curriculum |                                                                                                                                                                                                                                                 |                                                 |                                              |                                              |       |
| 1                                                                        | I need to be better educated about patients who identify as transgender to provide appropriate medical care for them.<br>Strongly Disagree<br>Disagree<br>Agree<br>Strongly Agree                                                               | 3 (1.2)<br>6 (2.4)<br>103 (41.4)<br>120 (48.2)  | 0 (0)<br>3 (2.7)<br>43 (38.1)<br>60 (53.1)   | 3 (2.2)<br>3 (2.2)<br>60 (44.1)<br>60 (44.1) | 0.374 |
| 2                                                                        | I feel that occurrence and prevalence of diseases in people who identify as transgender should be taught in addition to the occurrence and prevalence in cis males and cis females.<br>Strongly Disagree<br>Disagree<br>Agree<br>Strongly Agree | 3 (1.2)<br>10 (4.0)<br>123 (49.4)<br>91 (36.5)  | 1 (0.9)<br>4 (3.5)<br>52 (46.0)<br>44 (38.9) | 2 (1.5)<br>6 (4.4)<br>71 (52.2)<br>47 (34.6) | 0.765 |
| 3                                                                        | I need to be taught how to take the medical history of a patient who identifies as transgender .<br>Strongly Disagree<br>Disagree<br>Agree<br>Strongly Agree                                                                                    | 3 (1.2)<br>15 (6.0)<br>109 (43.8)<br>103 (41.4) | 0 (0)<br>6 (5.3)<br>48 (42.5)<br>52 (46.0)   | 3 (2.2)<br>9 (6.6)<br>61 (44.9)<br>51 (37.5) | 0.356 |
| 4                                                                        | I need to be taught how to perform a clinical examination on a patient who identifies as transgender.<br>Strongly Disagree<br>Disagree<br>Agree<br>Strongly Agree                                                                               | 4 (1.6)<br>11 (4.4)<br>107 (43.0)<br>110 (44.2) | 1 (0.9)<br>4 (3.5)<br>48 (42.5)<br>55 (48.7) | 3 (2.2)<br>7 (5.1)<br>59 (43.4)<br>55 (40.4) | 0.427 |
| 5                                                                        | I need to be taught how to counsel patients who identify as transgender.<br>Strongly Disagree<br>Disagree<br>Agree<br>Strongly Agree                                                                                                            | 2 (0.8)<br>8 (3.2)<br>11 (44.6)<br>113 (45.4)   | 0 (0)<br>4 (3.5)<br>45 (39.8)<br>58 (51.3)   | 2 (1.5)<br>4 (2.9)<br>66 (48.5)<br>55 (40.4) | 0.335 |
| 6                                                                        | I need to be taught how to counsel the families of patients who identify as transgender .<br>Strongly Disagree<br>Disagree                                                                                                                      | 2 (0.8)<br>8 (3.2)                              | 0 (0)<br>6 (5.3)                             | 2 (1.5)<br>2 (1.5)                           | 0.289 |

|    |                                                                                                                                                                                                       |                                                 |                                              |                                                |       |
|----|-------------------------------------------------------------------------------------------------------------------------------------------------------------------------------------------------------|-------------------------------------------------|----------------------------------------------|------------------------------------------------|-------|
|    | Agree<br>Strongly Agree                                                                                                                                                                               | 104 (41.8)<br>124 (49.8)                        | 44 (38.9)<br>58 (51.3)                       | 60 (44.1)<br>66 (48.5)                         |       |
| 7  | I need to be taught how to appropriately address patients who identify as transgender .<br><br>Strongly Disagree<br>Disagree<br>Agree<br>Strongly Agree                                               | 3 (1.2)<br>6 (2.4)<br>103 (41.4)<br>120 (48.2)  | 0 (0)<br>3 (2.7)<br>43 (38.1)<br>60 (53.1)   | 3 (2.2)<br>3 (2.2)<br>60 (44.1)<br>60 (44.1)   | 0.374 |
| 8  | If not taught as part of the curriculum, I would specifically read up on medical trans-health issues and emergencies.<br><br>Strongly Disagree<br>Disagree<br>Agree<br>Strongly Agree                 | 5 (2.0)<br>25 (10.0)<br>98 (38.6)<br>61 (24.5)  | 0 (0)<br>8 (7.1)<br>46 (40.7)<br>33 (29.2)   | 5 (3.7)<br>17 (12.5)<br>50 (36.8)<br>28 (20.6) | 0.035 |
| 9  | Medical students should be taught the rights of people who identify as transgender in longitudinal sessions .<br><br>Strongly Disagree<br>Disagree<br>Agree<br>Strongly Agree                         | 4 (1.6)<br>13 (5.2)<br>108 (43.4)<br>100 (40.2) | 1 (0.9)<br>3 (2.7)<br>51 (45.1)<br>51 (45.1) | 3 (2.2)<br>10 (7.4)<br>57 (41.9)<br>49 (36.0)  | 0.109 |
| 10 | Education on trans-health will fill a gap in students' medical knowledge.<br><br>Strongly Disagree<br>Disagree<br>Agree<br>Strongly Agree                                                             | 2 (0.8)<br>8 (3.2)<br>120 (48.2)<br>95 (38.2)   | 0 (0)<br>1 (0.9)<br>56 (49.6)<br>48 (42.5)   | 2 (1.5)<br>7 (5.1)<br>64 (47.1)<br>47 (34.6)   | 0.062 |
| 11 | Education on trans-health will improve patient care quality .<br><br>Strongly Disagree<br>Disagree<br>Agree<br>Strongly Agree                                                                         | 1 (0.4)<br>2 (0.8)<br>124 (49.8)<br>103 (41.4)  | 0 (0)<br>1 (0.9)<br>56 (49.6)<br>51 (45.1)   | 1 (0.7)<br>1 (0.7)<br>68 (50.0)<br>52 (38.2)   | 0.301 |
| 12 | Learning about trans-health will make me a better doctor.<br><br>Strongly Disagree<br>Disagree<br>Agree<br>Strongly Agree                                                                             | 3 (1.2)<br>3 (1.2)<br>103 (41.4)<br>118 (47.4)  | 1 (0.9)<br>1 (0.9)<br>44 (38.9)<br>57 (50.4) | 2 (1.5)<br>2 (1.5)<br>59 (43.4)<br>61 (44.9)   | 0.902 |
| 13 | Incorporation of trans-health in the medical curriculum will encourage individuals who identify as transgender to seek medical help .<br><br>Strongly Disagree<br>Disagree<br>Agree<br>Strongly Agree | 2 (0.8)<br>2 (0.8)<br>104 (41.8)<br>125 (50.2)  | 0 (0)<br>0 (0)<br>45 (39.8)<br>63 (55.8)     | 2 (1.5)<br>2 (1.5)<br>59 (43.4)<br>62 (45.6)   | 0.106 |

|    |                                                                                    |            |           |           |       |
|----|------------------------------------------------------------------------------------|------------|-----------|-----------|-------|
| 14 | Learning and applying trans-health will improve the healthcare system of Pakistan. |            |           |           |       |
|    | Strongly Disagree                                                                  | 2 (0.8)    | 0 (0)     | 2 (1.5)   | 0.061 |
|    | Disagree                                                                           | 2 (0.8)    | 1 (0.9)   | 1 (0.7)   |       |
|    | Agree                                                                              | 96 (38.6)  | 36 (31.9) | 60 (44.1) |       |
|    | Strongly Agree                                                                     | 127 (51.0) | 68 (60.2) | 59 (43.4) |       |

\* = (Responses marked *Unsure* are not included)



# Appendix

## *Questionnaire*

### **Section 1: Demographics**

1. **Age:** □□ in years
2. **Gender (select one):** 1.  Cis Male    2.  Cis Female    3.  Transgender    4.  Other (please specify) \_\_\_\_\_
3. **Batch:** Class of 20□□
4. **Current residence:** 1. AKU Hostel / 2. Elsewhere in Karachi
5. **Previous City of Residence (prior to joining AKU):** \_\_\_\_\_
6. **Ethnicity (select one):** 1.  Pashtun    2.  Punjabi    3.  Sindhi    4.  Balochi    5.  Muhajir    6.  Mixed    7.  Other (please specify) \_\_\_\_\_

### **Section 2: Knowledge**

Written below are a series of statements. On a scale of 1 to 5, rate the degree of your agreement with each statement.

| Strongly Disagree | Disagree | Unsure | Agree | Strongly Agree |
|-------------------|----------|--------|-------|----------------|
| (1)               | (2)      | (3)    | (4)   | (5)            |

#### **2.1. Knowledge of the Transgender Identity**

- 1) \_\_\_\_ Gender identity is always the same as sex assigned at birth.
- 2) \_\_\_\_ Gender identity is synonymous with sexual orientation.
- 3) \_\_\_\_ The transgender identity is an inherited condition.
- 4) \_\_\_\_ The transgender identity is a contagious condition.
- 5) \_\_\_\_ The transgender identity is a modern concept due to the influence of media.
- 6) \_\_\_\_ The transgender identity is always a choice.
- 7) \_\_\_\_ The transgender identity is a disease.
- 8) \_\_\_\_ The transgender identity is a mental illness.
- 9) \_\_\_\_ The term “transgender” is synonymous with “intersex”.
- 10) \_\_\_\_ The term “transgender” is synonymous with “transvestite”.

#### **2.2. Knowledge of Differences in Health Needs**

1. \_\_\_\_ Individuals who identify as transgender always have physical deformities.
2. \_\_\_\_ Patients who identify as transgender may have unique health risks and needs.
3. \_\_\_\_ Individuals who identify as transgender are naturally sterile and cannot reproduce.
4. \_\_\_\_ Individuals who identify as transgender have a higher incidence of substance abuse than the general population.

5. \_\_\_\_ Individuals who identify as transgender have a higher incidence of sexually transmitted illnesses than the general population.
6. \_\_\_\_ Individuals who identify as transgender are more likely to develop mental illnesses than the general population.
7. \_\_\_\_ Individuals who identify as transgender have higher suicide rates than the general population.
8. \_\_\_\_ Individuals who identify as transgender who receive hormonal therapy are more susceptible to certain conditions as a result.
9. \_\_\_\_ There are sufficient physician treatment guidelines for patients who identify as transgender.
10. \_\_\_\_ There has been sufficient medical research conducted on the health of individuals who identify as transgender.

### **Section 3: Perceptions and Attitudes**

Written below are a series of statements. On a scale of 1 to 5, rate the degree of your agreement with each statement.

| Strongly Disagree | Disagree | Unsure | Agree | Strongly Agree |
|-------------------|----------|--------|-------|----------------|
| (1)               | (2)      | (3)    | (4)   | (5)            |

#### **3.1. Societal Perceptions**

1. \_\_\_\_ Individuals who identify as transgender are well integrated into society.
2. \_\_\_\_ Individuals who identify as transgender currently have equal access to education.
3. \_\_\_\_ Individuals who identify as transgender currently have equal access to employment.
4. \_\_\_\_ Individuals who identify as transgender currently have equal access to housing.
5. \_\_\_\_ Individuals who identify as transgender currently have equal access to healthcare.
6. \_\_\_\_ Individuals who identify as transgender currently have equal access to legal justice.
7. \_\_\_\_ Individuals who identify as transgender are victims of societal harassment.
8. \_\_\_\_ Society is accepting of individuals who identify as transgender
9. \_\_\_\_ Individuals who identify as transgender frequently experience rejection by their own families.
10. \_\_\_\_ Society feels that individuals who identify as transgender spread immorality and promiscuity.
11. \_\_\_\_ Society feels that individuals who identify as transgender should remain confined to their designated localities.

#### **3.2. Personal Attitudes**

1. \_\_\_\_ I am comfortable around individuals who identify as transgender.
2. \_\_\_\_ I would feel comfortable working closely with an individual who identifies as transgender in my workplace.
3. \_\_\_\_ I believe I could be friends with an individual who identifies as transgender.
4. \_\_\_\_ As a doctor, I would be comfortable treating an individual who identifies as transgender.
5. \_\_\_\_ I would feel comfortable having an individual who identifies as transgender working in my home.

6. \_\_\_\_ I would feel comfortable being served by an individual who identifies as transgender at a store or restaurant.
7. \_\_\_\_ I would feel comfortable sharing a living space with an individual who identifies as transgender.
8. \_\_\_\_ I believe an individual who identifies as transgender should be treated with the same respect and dignity as any other person.
9. \_\_\_\_ I would intervene to help if I saw an individual who identifies as transgender being teased or mistreated.
10. \_\_\_\_ I would be upset if someone I'd known for a long time revealed that they used to identify as a different gender.
11. \_\_\_\_ I believe individuals who identify as transgender should have the opportunity to change their name.
12. \_\_\_\_ Individuals who identify as transgender should be facilitated if they want to medically/surgically transition.
13. \_\_\_\_ Individuals who identify as transgender should be allowed to raise children.
14. \_\_\_\_ Individuals who identify as transgender should be forcefully sterilized.

#### Section 4: Clinical Experiences

Written below are a series of statements. On a scale of 1 to 5, rate the degree of your agreement with each statement.

|                   |          |        |       |                |
|-------------------|----------|--------|-------|----------------|
| Strongly Disagree | Disagree | Unsure | Agree | Strongly Agree |
| (1)               | (2)      | (3)    | (4)   | (5)            |

1. \_\_\_\_ I feel individuals who identify as transgender are treated differently in a clinical setting.
2. \_\_\_\_ I feel that it would be difficult to discuss sexual health with patients who identify as transgender.
3. \_\_\_\_ I would feel unsure of how to address patients who identify as transgender.
4. \_\_\_\_ I would feel unsure of how to perform a clinical examination on a patient who identifies as transgender.
5. \_\_\_\_ I would feel unsure of the need for a chaperone while examining a patient who identifies as transgender.

#### Section 5: Personal Interactions

1. Have you ever interacted with someone who identifies as transgender? 1. Yes / 2. No (skip to question 5 if no)
2. How many friends do you have who identify as transgender? \_\_\_\_
3. As a medical student, have you ever interacted with an individual who identified as transgender, in a clinical setting? 1. Yes / 2. No
4. What is the closest relationship between you and an individual who identifies as transgender (select one):
  1.  Self
  2.  Sibling
  3.  Patient
  4.  Romantic partner
  5.  Friend
  6.  Teacher
  7.  Coworker
  8.  Acquaintance

5. Mark all the sources where you have heard or seen trans-health-related information (select all that apply):
1.  Friends
  2.  Family
  3.  Television/ Movies / Documentaries
  4.  News
  5.  Social Media
  6.  Books
  7.  Class / seminar / community event

## Section 6: Perceived Need for Trans-health within the Medical Curriculum

Written below are a series of statements. On a scale of 1 to 5, rate the degree of your agreement with each statement.

| Strongly Disagree | Disagree | Unsure | Agree | Strongly Agree |
|-------------------|----------|--------|-------|----------------|
| (1)               | (2)      | (3)    | (4)   | (5)            |

1. \_\_\_\_ I need to be better educated about patients who identify as transgender to provide appropriate medical care for them.
2. \_\_\_\_ I feel that occurrence and prevalence of diseases in people who identify as transgender should be taught in addition to the occurrence and prevalence in cis males and cis females.
3. \_\_\_\_ I need to be taught how to take the medical history of a patient who identifies as transgender.
4. \_\_\_\_ I need to be taught how to perform a clinical examination on a patient who identifies as transgender.
5. \_\_\_\_ I need to be taught how to counsel patients who identify as transgender.
6. \_\_\_\_ I need to be taught how to counsel the families of patients who identify as transgender.
7. \_\_\_\_ I need to be taught how to appropriately address patients who identify as transgender.
8. \_\_\_\_ If not taught as part of the curriculum, I would specifically read up on medical trans-health issues and emergencies.
9. \_\_\_\_ Medical students should be taught the rights of people who identify as transgender in longitudinal sessions.
10. \_\_\_\_ Education on trans-health will fill a gap in students' medical knowledge.
11. \_\_\_\_ Education on trans-health will improve patient care quality.
12. \_\_\_\_ Learning about trans-health will make me a better doctor.
13. \_\_\_\_ Incorporation of trans-health in the medical curriculum will encourage individuals who identify as transgender to seek medical help.
14. \_\_\_\_ Learning and applying trans-health will improve the healthcare system of Pakistan.
